# Supplementary material for: Regioisomer effects of dibenzofuran-based bipolar host materials on yellow phosphorescent OLED device performance
Source: Royal Society of Chemistry journal article supplement (doi:10.1039/c9nj05249f), 2020-01-01
Supplement: c9nj05249f1.pdf [file c9nj05249f1.pdf]

**Supporting Information for;**

**Regioisomer Effects of Dibenzofuran-based Bipolar Host  
Materials on Yellow Phosphorescent OLED Device Performance**

**Nam Hee Cho<sup>1</sup>, Jun Yeob Lee<sup>2</sup>, Oh Young Kim<sup>1</sup>, and Seok-Ho Hwang<sup>1,\*</sup>**

<sup>1</sup>Department of Polymer Science & Engineering, Materials Chemistry & Engineering Laboratory, Dankook University, Yongin, Gyeonggi 16890, Korea; <sup>2</sup>School of Chemical Engineering, Sungkyunkwan University, Suwon, Gyeonggi 16419, Korea

\*To whom the correspondence should be addressed. E-mail: *bach@dankook.ac.kr*

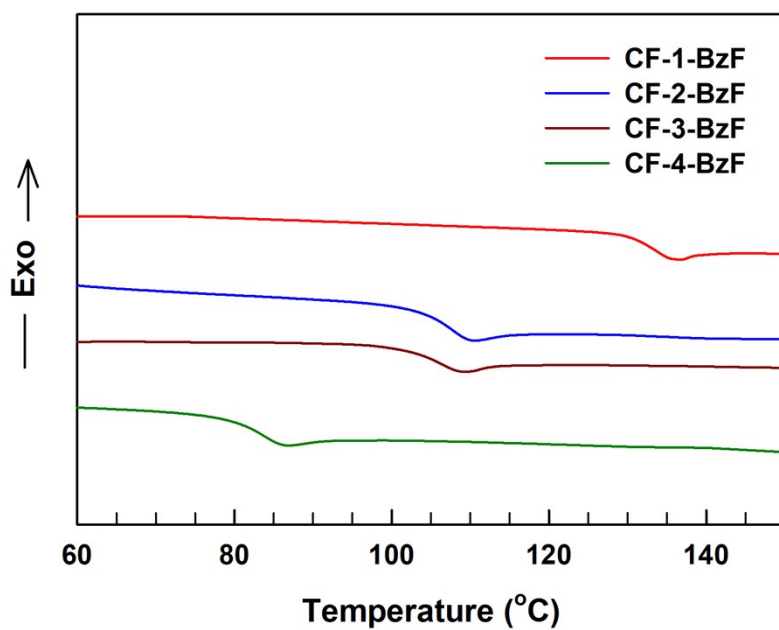

**Figure S1.** DSC thermograms of CF-1-BzF, CF-2-BzF, CF-3-BzF, and CF-4-BzF under a heating rate of 10 °C/min.

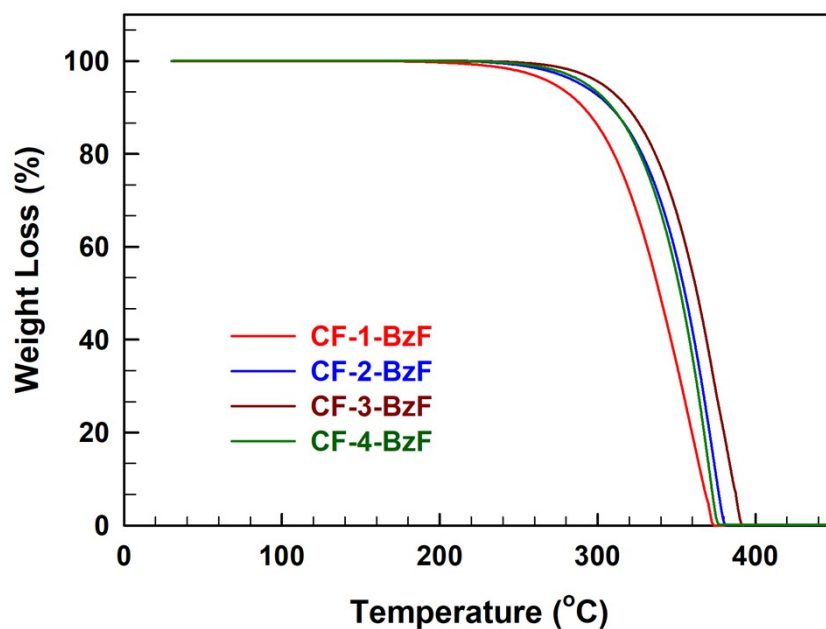

**Figure S2.** TGA thermograms for CF-1-BzF, CF-2-BzF, CF-3-BzF, and CF-4-BzF under a heating rate of 20 °C/min.

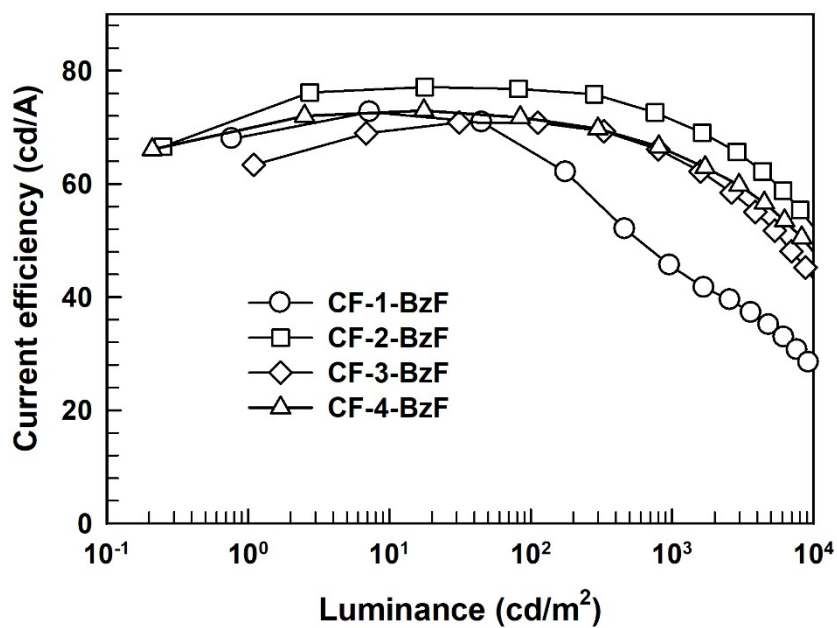

**Figure S3.** Current efficiency-luminance curves of [PO-01]-based devices with CF-1-BzF, CF-2-BzF, CF-3-BzF, and CF-4-BzF, respectively.

**Table S1.** Optoelectronic data of synthesized host materials.

| Host Compound   | $\lambda_{max, abs}$ (nm) | $\lambda_{emission}$ (nm) | $E_T$ (eV) | HOMO <sup>a</sup> (eV) | LUMO <sup>a</sup> (eV) | $E_g^b$ (eV) | $E_g^c$ (eV) |
|-----------------|---------------------------|---------------------------|------------|------------------------|------------------------|--------------|--------------|
| <b>CF-1-BzF</b> | 321                       | 414                       | 2.27       | -5.9                   | -2.5                   | 3.3          | 3.4          |
| <b>CF-2-BzF</b> | 325                       | 418                       | 2.41       | -5.8                   | -2.4                   | 3.3          | 3.4          |
| <b>CF-3-BzF</b> | 337                       | 418                       | 2.30       | -5.8                   | -1.9                   | 3.3          | 3.9          |
| <b>CF-4-BzF</b> | 324                       | 416                       | 2.37       | -5.8                   | -1.8                   | 3.5          | 4.0          |

<sup>a</sup>: HOMO and LUMO were calculated from the onset value of the oxidation and reduction potentials, respectively.

<sup>b</sup>: The band gap energies were estimated from the optical absorption edges of UV-Vis absorption spectra.

<sup>c</sup>: The band gap energies were estimated from CV.

**Table S2.** Electroluminescence characteristics of the [PO-01]-based yellow PhOLEDs.

| Host Compound   | Doping Conc. (%) | $V_{on}^a$ (V) at 1 cd/m <sup>2</sup> | CE (cd/A) |       | PE (lm/W) |       | EQE (%) |       | CIE ( <i>x</i> ; <i>y</i> ) |
|-----------------|------------------|---------------------------------------|-----------|-------|-----------|-------|---------|-------|-----------------------------|
|                 |                  |                                       | 1000 cd   | Max.  | 1000 cd   | Max.  | 1000 cd | Max.  |                             |
| <b>CF-1-BzF</b> | 5                | 6.8                                   | 35.89     | 74.56 | 16.88     | 52.04 | 11.35   | 23.71 | (0.49 ; 0.51)               |
|                 | 10               | 6.5                                   | 45.37     | 72.68 | 21.84     | 53.6  | 14.85   | 23.98 | (0.50 ; 0.50)               |
| <b>CF-2-BzF</b> | 5                | 6.5                                   | 74.11     | 76.59 | 35.99     | 53.13 | 23.73   | 24.54 | (0.50 ; 0.50)               |
|                 | 10               | 6.1                                   | 71.60     | 77.12 | 36.70     | 59.78 | 23.49   | 25.27 | (0.50 ; 0.49)               |
| <b>CF-3-BzF</b> | 5                | 7.2                                   | 69.70     | 73.48 | 30.55     | 40.24 | 22.91   | 24.16 | (0.50 ; 0.49)               |
|                 | 10               | 6.6                                   | 65.09     | 70.87 | 30.90     | 49.75 | 21.93   | 23.90 | (0.51 ; 0.49)               |
| <b>CF-4-BzF</b> | 5                | 6.5                                   | 70.15     | 72.79 | 34.01     | 44.55 | 22.33   | 23.19 | (0.49 ; 0.50)               |
|                 | 10               | 6.1                                   | 65.78     | 72.94 | 33.88     | 59.30 | 21.45   | 23.82 | (0.50 ; 0.50)               |

<sup>a</sup>: turn-on voltage
